# Supplementary material for: Parameterizing the vertical downward dispersion of ship exhaust gas in the near field
Source: Copernicus journal article supplement (doi:10.5194/acp-21-5935-2021), 2021-04-20
Supplement: Supplementary file 1 [file acp-21-5935-2021-supplement.zip]

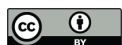

## *Supplement of*

# **Parameterizing the vertical downward dispersion of ship exhaust gas in the near field**

**Ronny Badeke et al.**

*Correspondence to:* Ronny Badeke ([ronny.badeke@hereon.de](mailto:ronny.badeke@hereon.de))

- [acp-21-5935-2021-supplement-title-page.pdf](#)
- Supplement
  - Table S1.docx
  - Table S1.pdf
  - Table S2.docx
  - Table S2.pdf
  - `multilinear_regression.py`
  - `regression_data.csv`

The copyright of individual parts of the supplement might differ from the article licence.
