# Supplementary material for: Parameterizing the vertical downward dispersion of ship exhaust gas in the near field
Source: Copernicus journal article supplement (doi:10.5194/acp-21-5935-2021), 2021-04-20
Supplement: Supplementary file 2 [file acp-21-5935-2021-supplement.zip]

**Table S2:** Exemplary comparison of MITRAS results for two different ship types.

| <b>Inputs</b>                         | <b>Cruise Ship</b>            | <b>Container Ship</b> |
|---------------------------------------|-------------------------------|-----------------------|
| Length                                | 246 m                         | 168 m                 |
| Width                                 | 30 m                          | 27 m                  |
| Height stack                          | 52 m                          | 38 m                  |
| Wind speed at stack height            | 5 ms <sup>-1</sup>            |                       |
| Wind direction                        | frontal                       |                       |
| Exit velocity                         | 10 ms <sup>-1</sup>           |                       |
| Exhaust temperature                   | 15°C                          |                       |
| Stability                             | -0.65 K · 100 m <sup>-1</sup> |                       |
| <b>Output</b>                         |                               |                       |
| Downward Dispersion in 100 m distance | 43 %                          | 33 %                  |
