# Supplementary material for: Parameterizing the vertical downward dispersion of ship exhaust gas in the near field
Source: Copernicus journal article supplement (doi:10.5194/acp-21-5935-2021), 2021-04-20
Supplement: Supplementary file 3 [file acp-21-5935-2021-supplement.zip]

**Table S1:** Comparison of results of plume center heights  $h_{\text{center}}$  for MITRAS and IBJPluris for different selected cases (case numbers based on Table C1).

| Case name & number           | $v_{\text{wind}}$<br>[m s <sup>-1</sup> ] | $v_{\text{exit}}$<br>[m s <sup>-1</sup> ] | $T_{\text{exh}}$<br>[°C] | $\Gamma$<br>[K · 100 m <sup>-1</sup> ] | MITRAS                             |                                   | IBJPluris                          |                                   | min(  $\Delta h_{\text{MITRAS}} - \Delta h_{\text{Pluris}}$  )<br>[m] |
|------------------------------|-------------------------------------------|-------------------------------------------|--------------------------|----------------------------------------|------------------------------------|-----------------------------------|------------------------------------|-----------------------------------|-----------------------------------------------------------------------|
|                              |                                           |                                           |                          |                                        | $h_{\text{center, MITRAS}}$<br>[m] | $\Delta h_{\text{MITRAS}}$<br>[m] | $h_{\text{center, Pluris}}$<br>[m] | $\Delta h_{\text{Pluris}}$<br>[m] |                                                                       |
| Default settings (8)         | 5                                         | 10                                        | 300                      | -0.65                                  | 110                                | 58                                | 76 – 92                            | 24 – 40                           | 18                                                                    |
| Low wind speed (2)           | 2                                         | 10                                        | 300                      | -0.65                                  | 160                                | 108                               | 117 – 151                          | 65 – 99                           | 9                                                                     |
| high wind speed (36)         | 15                                        | 10                                        | 300                      | -0.65                                  | 76                                 | 24                                | 61 – 66                            | 9 – 14                            | 10                                                                    |
| low exit velocity (25)       | 5                                         | 4                                         | 300                      | -0.65                                  | 104                                | 52                                | 71 – 82                            | 19 – 30                           | 22                                                                    |
| high exit velocity (27)      | 5                                         | 12                                        | 300                      | -0.65                                  | 112                                | 60                                | 79 – 95                            | 27 – 43                           | 17                                                                    |
| low exhaust temperature (7)  | 5                                         | 10                                        | 200                      | -0.65                                  | 102                                | 50                                | 77 – 91                            | 25 – 39                           | 11                                                                    |
| high exhaust temperature (9) | 5                                         | 10                                        | 400                      | -0.65                                  | 116                                | 64                                | 79 – 95                            | 27 – 43                           | 21                                                                    |
| unstable condition (33)      | 5                                         | 10                                        | 300                      | -1.2                                   | 112                                | 60                                | 78 – 93                            | 26 – 41                           | 19                                                                    |
| very stable condition (28)   | 5                                         | 10                                        | 300                      | +0.5                                   | 100                                | 48                                | 77 – 91                            | 25 – 39                           | 9                                                                     |
